# Supplementary material for: The N-terminus of RPA large subunit and its spatial position are important for the 5′->3′ resection of DNA double-strand breaks
Source: PubMed Central journal article supplement (PMC4605295; doi:10.1093/nar/gkv764), 2015-10-10
Supplement: supp_gkv764_nar-01496-d-2015-File011.pdf [file supp_gkv764_nar-01496-d-2015-File011.pdf]

**A**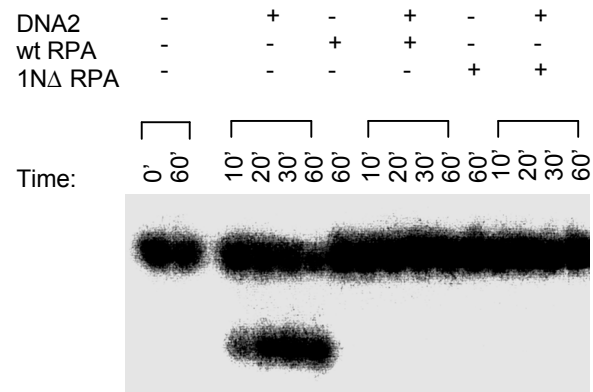**B**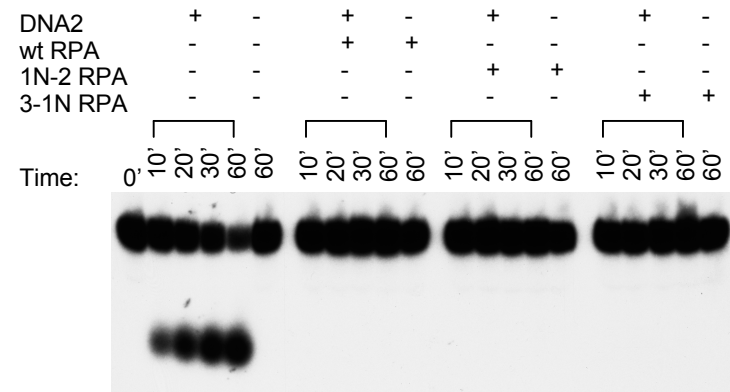

**Figure S1. Mutant RPA complexes retain the activity to protect the 3' end of ss-DNA from DNA2 attack. (A)** Effect of wild-type and 1N $\Delta$  RPA on the 3'->5' degradation of ss-DNA by DNA2. The substrate was a 3' <sup>32</sup>P-labeled ss-48mer oligonucleotide attached to magnetic beads via a biotinylated nucleotide at the 5' end. It was incubated with DNA2 and wild-type or 1N $\Delta$  RPA (4/ng/ $\mu$ l) for the indicated times and the products were analyzed by a 8% TAE-PAGE. The gel was dried and exposed to Fuji phosphorimager. **(B)** Effect of 1N-2 and 3-1N RPA on the 3'->5' degradation of ss-DNA by DNA2. The substrate was incubated with DNA2 and wild-type, 1N-2, or 3-1N RPA (4/ng/ $\mu$ l) for the indicated times and the products were analyzed by a 8% TAE-PAGE. The gel was dried and exposed to X-ray film.

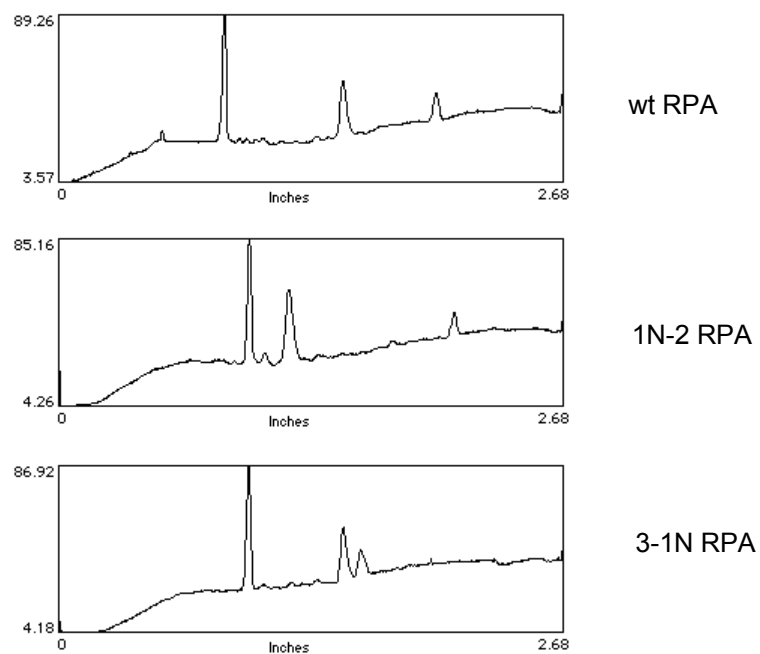

**Figure S2. Density plots of the wild-type, 1N-2, and 3-1N RPA complexes.** The gel in **Figure 6A** was scanned and plotted using NIH image. Comparisons were made between the wild-type and 3-1N, which share the RPA2 subunit, and between 3-1N and 1N-2, which share the RPA1 $\Delta$ N subunit.
